# Supplementary material for: NFAT5 directs hyperosmotic stress-induced fibrin deposition and macrophage infiltration via PAI-1 in endothelium
Source: publisher site journal article supplement (doi:10.18632/aging.202330), 2020-12-19
Supplement: Supplementary file [file aging-v13i3-202330-supplementary-material-SD2.pdf]

**SUPPLEMENTARY FIGURES**

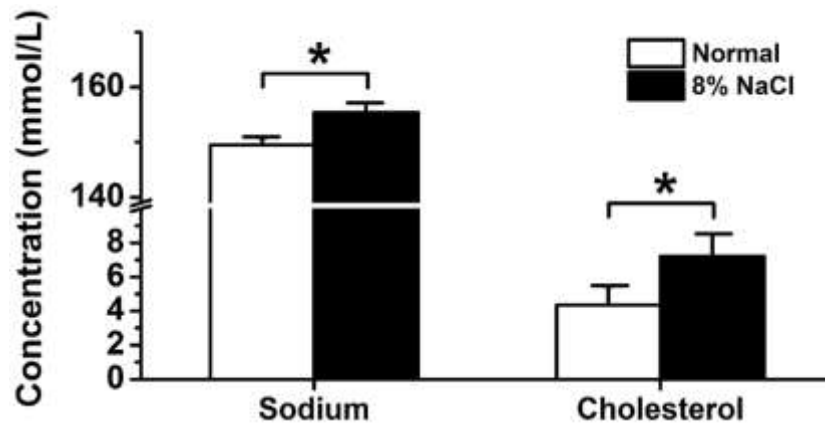

**Supplementary Figure 1.** The concentration of serum sodium and cholesterol in ApoE<sup>-/-</sup> mice feeding for 4 weeks. All data were presented as mean ± SEM, N ≥ 3. \*p < 0.05 versus control group.

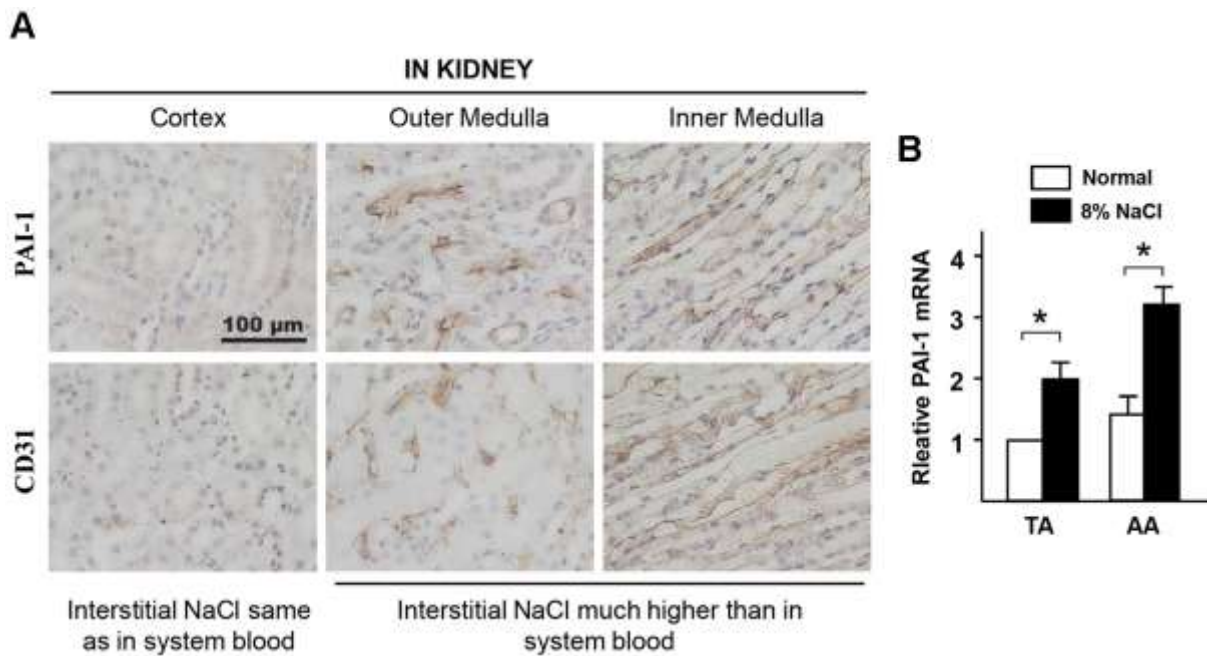

**Supplementary Figure 2. High-salt increases PAI-1 expression in ECs.** (A) Representative immunohistochemistry staining for PAI-1 in the kidney of mice feeding for 4 weeks. Nuclei, hematoxylin staining. (B) mRNA expression of PAI-1 in TA and AA regions of ApoE<sup>-/-</sup> mice in normal and high salt groups after 4 weeks feeding. All data were presented as mean ± SEM, N ≥ 3. \*p < 0.05 versus control group.

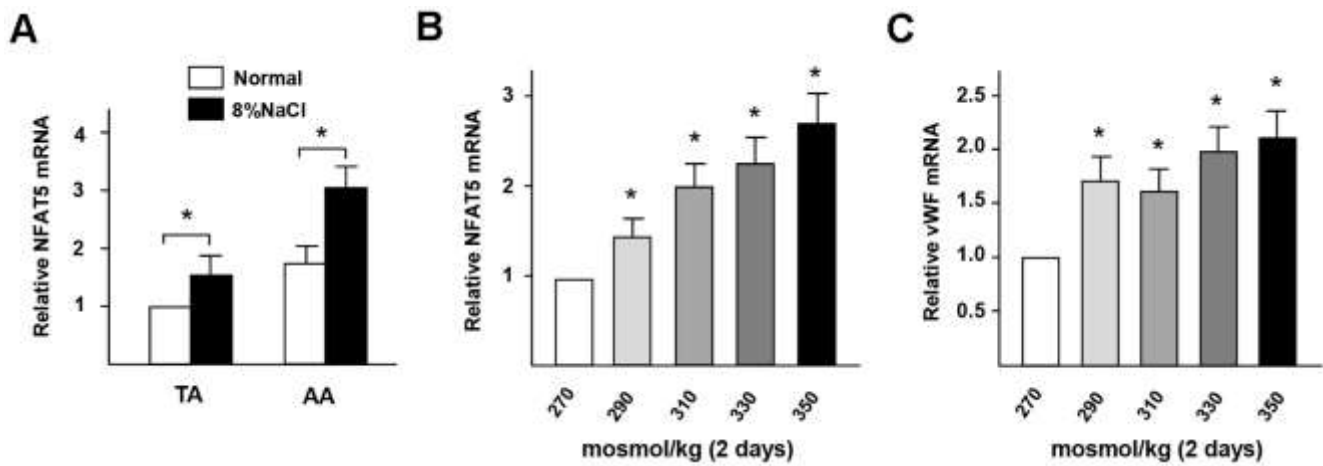

**Supplementary Figure 3. High-salt increases the mRNA expression of NFAT5 and vWF in ECs.** (A) mRNA expression of NFAT5 in TA and AA regions of ApoE<sup>-/-</sup> mice in normal and high salt groups after 4 weeks feeding. (B, C) mRNA expression of NFAT5 and vWF in HUVECs that exposed to different hyper-osmotic media for two days. All data were presented as mean ± SEM, N ≥ 3. \*p < 0.05 versus control group.

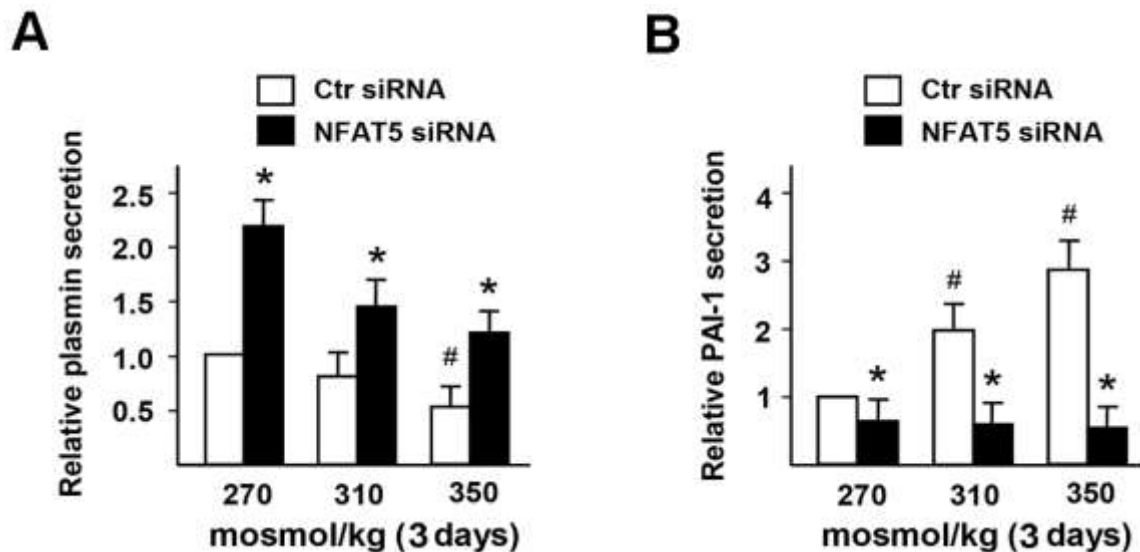

**Supplementary Figure 4. High-salt induces the dysfunction of PAI-1-dependent fibrinolysis in ECs via NFAT5.** (A) The secretion of active plasmin in HUVECs that transfected with Ctr siRNA or NFAT5 siRNA under high-salt condition. (B) The secretion of PAI-1 protein in HUVECs that transfected with Ctr siRNA or NFAT5 siRNA under high-salt condition. All data were presented as mean ± SEM, N ≥ 3. \*p < 0.05 versus control group.

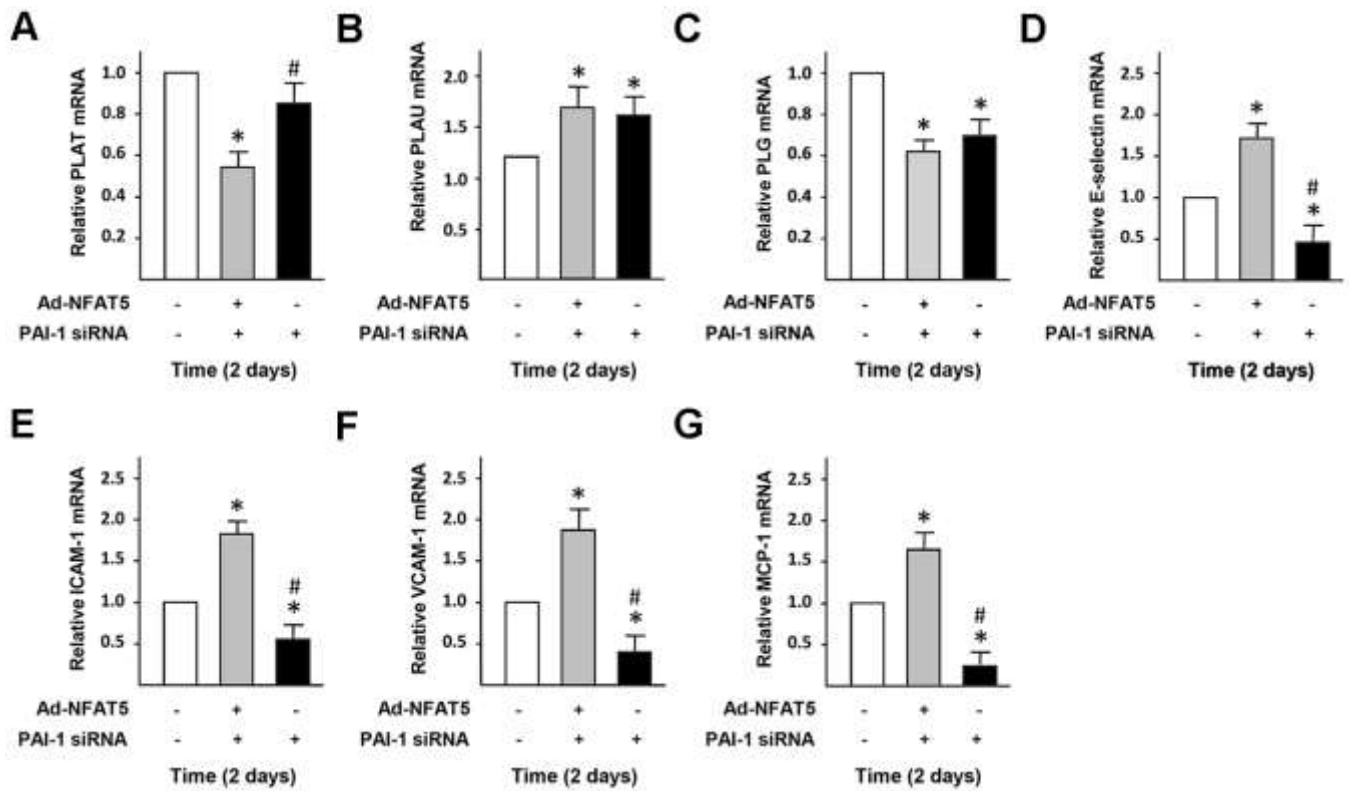

**Supplementary Figure 5. The effect of PAI-1 knockdown on the dysfunction of endothelial fibrinolysis and monocytes adhesion in NFAT5-overexpressing cells.** (A–C) mRNA expression of fibrinolysis genes (PLAT, PLAU and PLG) in ECs that transfected by Adenovirus-NFAT5 and/or PAI-1 siRNA. (D–G) mRNA expression of adhesive molecules (E-selectin, ICAM-1, VCAM-1, and MCP-1) in ECs that transfected by Adenovirus-NFAT5 and/or PAI-1 siRNA. All data were presented as mean  $\pm$  SEM,  $N \geq 3$ . \* $p < 0.05$  versus control group.

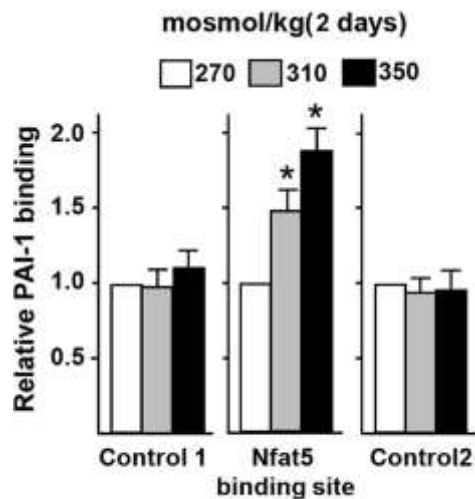

**Supplementary Figure 6. The binding of NFAT5 to PAI-1 promoter in HUVECs that transfected with NFAT5 siRNA under high-salt condition.** All data were presented as mean  $\pm$  SEM,  $N \geq 3$ . \* $p < 0.05$  versus control group.
